# Supplementary material for: A self-roughened and biodegradable superhydrophobic coating with UV shielding, solar-induced self-healing and versatile oil–water separation ability
Source: Royal Society of Chemistry journal article supplement (doi:10.1039/c8ta10869b), 2018-12-19
Supplement: c8ta10869b4.pdf [file c8ta10869b4.pdf]

## Supplementary Information

### **A self-roughened and biodegradable superhydrophobic coating with UV shielding, solar-induced self-healing and versatile oil-water separation property**

Xiuli Dong,<sup>a†</sup> Shouwei Gao,<sup>a†</sup> Jianying Huang,<sup>b</sup> Shuhui Li,<sup>ac</sup> Tianxue Zhu,<sup>a</sup> Yan Cheng,<sup>a</sup> Zhong Chen,<sup>d</sup> and Yuekun Lai<sup>\*,ab</sup>

---

<sup>a</sup>National Engineering Laboratory for Modern Silk, College of Textile and Clothing Engineering, Soochow University, Suzhou 215123, P. R. China.

<sup>b</sup>College of Chemical Engineering, Fuzhou University, Fuzhou 350116, P. R. China.

<sup>c</sup>Department of Chemistry, University College London, London, UK.

<sup>d</sup>School of Materials Science and Engineering, Nanyang Technological University, 50 Nanyang Avenue, Singapore.

<sup>†</sup> These authors contributed equally.

#### **Supplemental figure captions:**

**Figure S1.** Contact angle and adhesion force of superhydrophobic cotton fabric with different concentration of stearic acid.

**Figure S2.** The cotton fabric modified by the dipping STA emulsions (a) newly prepared and (b) after stored for 10 weeks and ultrasonically (40 kHz) treated at 50 °C for 5 min. The insert images are corresponding water droplet images with displayed CA.

**Figure S3.** The contact angle of STA/PDA@ cotton fabric with different abrasion cycles before and after self-healing.

**Figure S4.** The volume of water and heavy oil before and filtration for one and five times.

**Figure S5.** The volume of water and light oil before and filtration for one and five times.

**Figure S6** Sequence of the separation process for the corrosive mixtures of oil and acid/alkali solutions, and the volume of water and oil before and after separation.

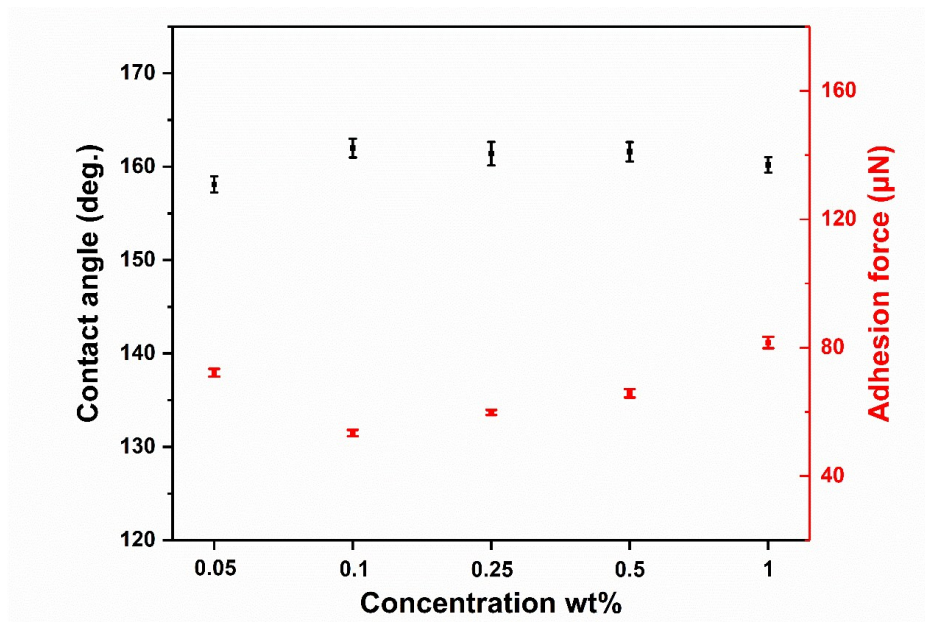

**Figure S1.** Contact angle and adhesion force of superhydrophobic cotton fabric with different concentration of stearic acid.

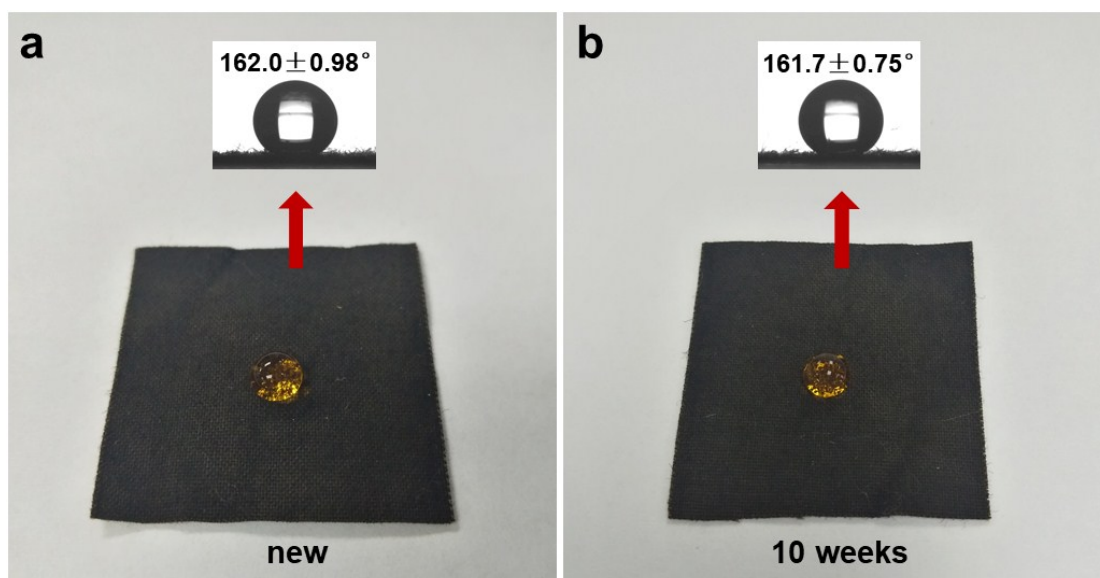

**Figure S2.** The cotton fabric modified by the dipping STA emulsions (a) newly prepared and (b) after stored for 10 weeks and ultrasonically (40 kHz) treated at 50 °C for 5 min. The insert images are corresponding water droplet images with displayed CA.

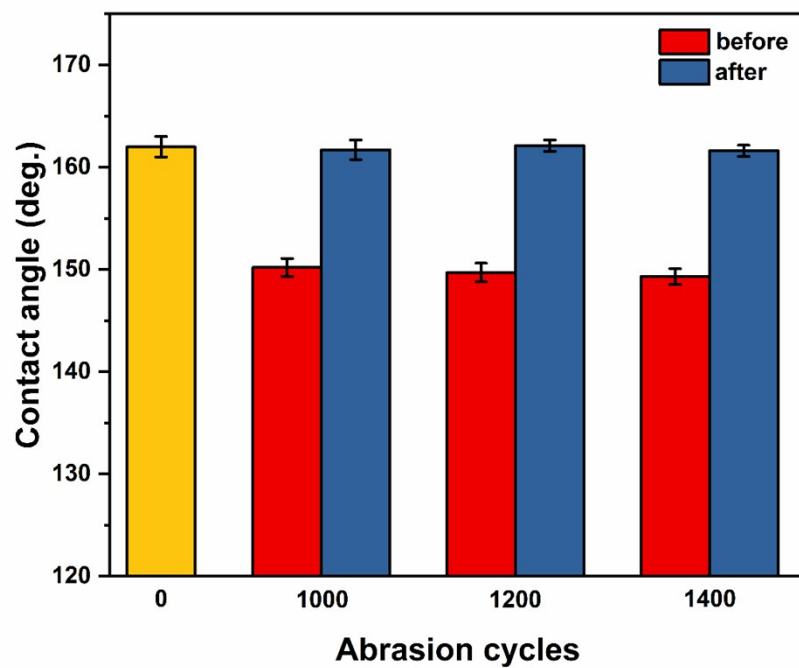

**Figure S3.** The contact angle of STA/PDA@ cotton fabric with different abrasion cycles before and after self-healing.

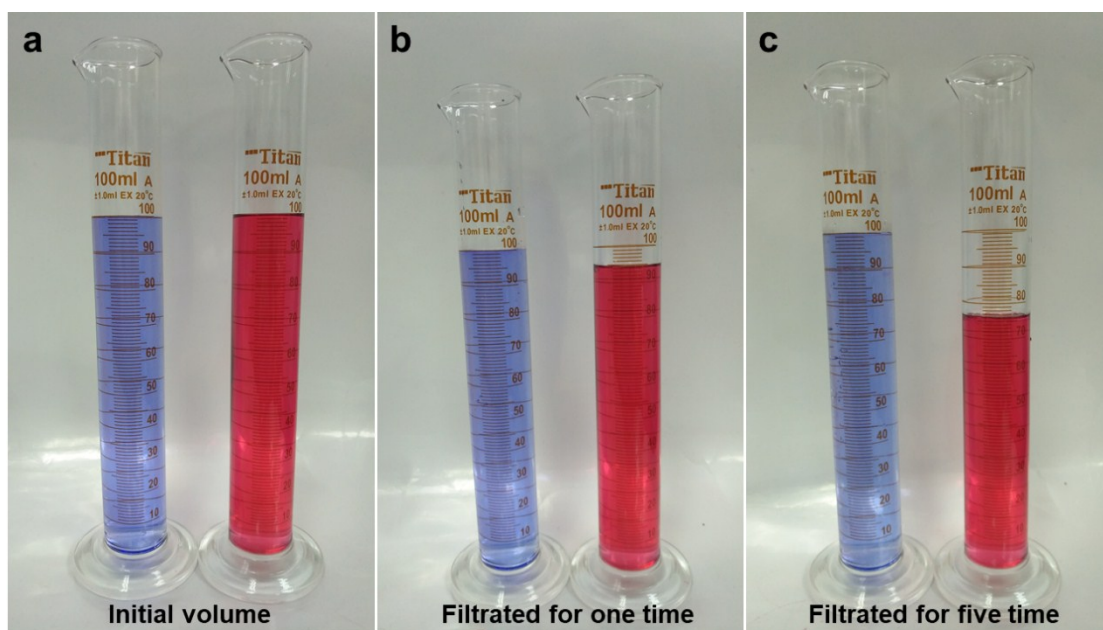

**Figure S4.** The volume of water and heavy oil before and filtration for one and five times.

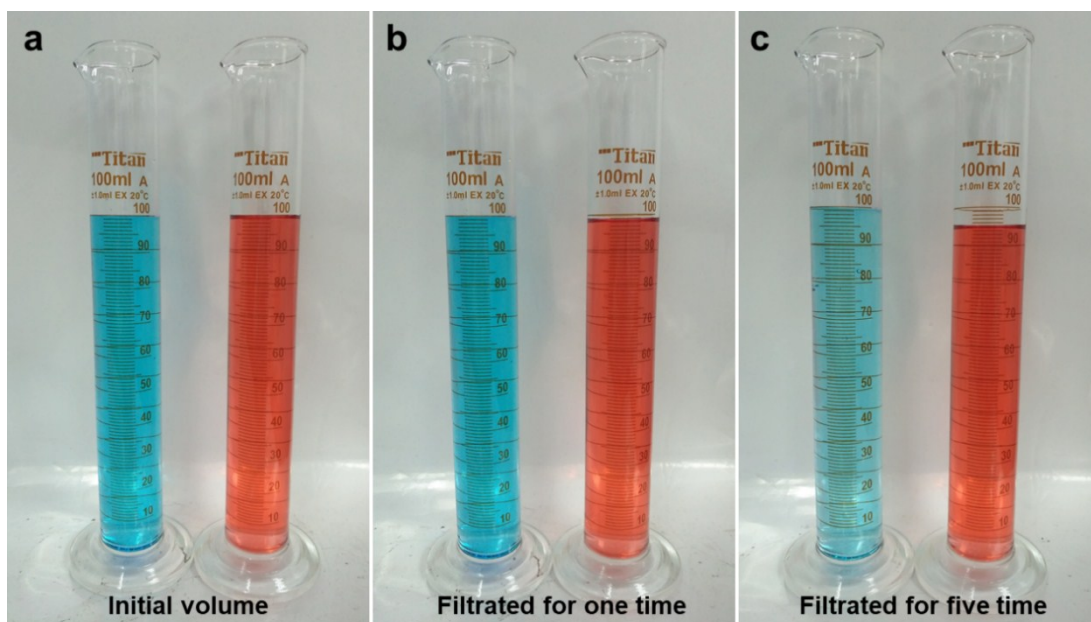

**Figure S5.** The volume of water and light oil before and filtration for one and five times.

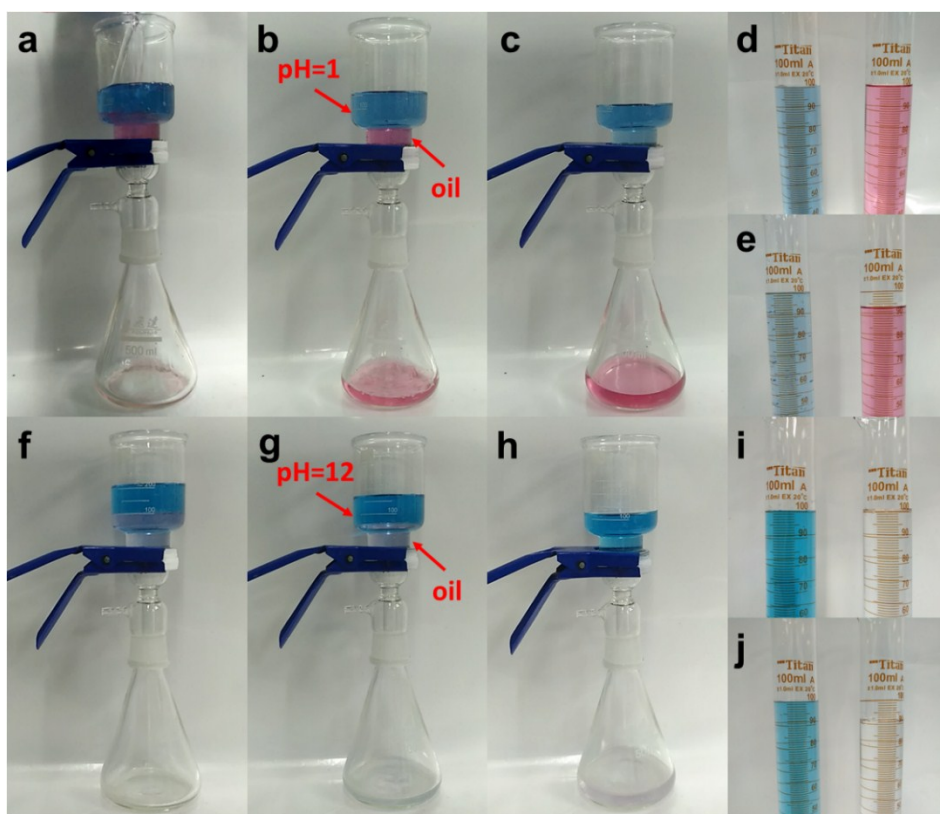

**Figure S6.** Sequence of the separation process for the corrosive mixtures of oil and acid/alkali solutions, and the volume of water and oil before and after separation.
